# Supplementary material
Source: Springer Nature journal article supplement (https://www.springermedizin.de/resource/supplementary/12950_2012_240_MOESM2_ESM.pdf/9558272)

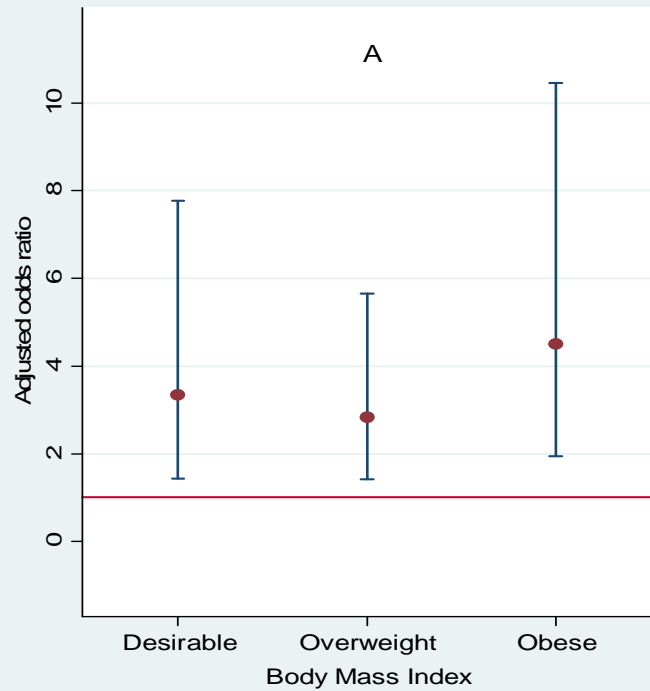

— 95% CI    ● Odds ratio

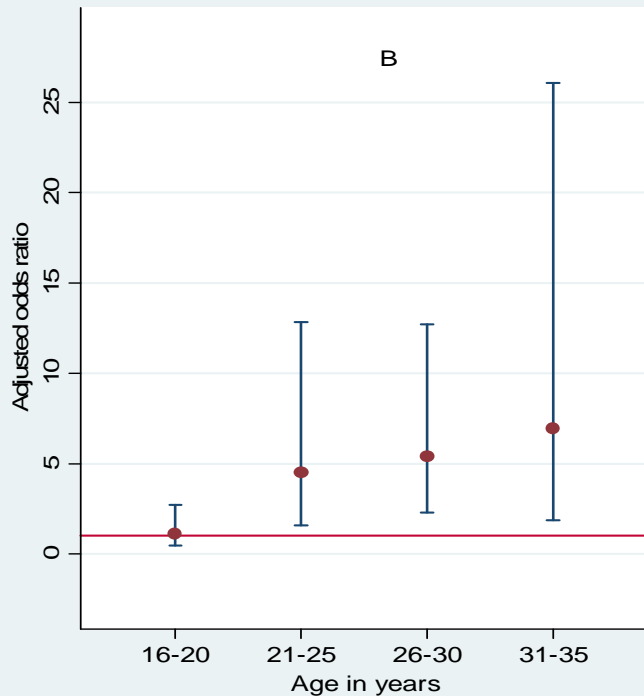

— 95% CI    ● Odds ratio

Supplement: MOESM2 [file 9558272]
